# Supplementary material for: Comparative Efficacy and Tolerability of Neoadjuvant Immunotherapy Regimens for Patients with HER2-Positive Breast Cancer: A Network Meta-Analysis
Source: J Oncol. 2019 Mar 19;2019:3406972. doi: 10.1155/2019/3406972 (PMC6444249; doi:10.1155/2019/3406972)
Supplement: Supplementary Materials — The submitted compressed file (Suppl.zip) contains the following supplementary figures and tables: Figure S1. Treatment Rankings for Each Outcome; Figure S2. Meta-regression Analysis with Adjustment for Hormone Receptor Status for Pathological Complete Response; Figure S3. Pooled Estimates for Overall Serious Adverse Events Using Fixed-effect Model. eTable 1. Literature Search Strategy; eTable 2. Characteristics of Included Trials and Patient Populations; eTable 3. Neoadjuvant Treatments in Included Trials; eTable 4. Bias Assessment of Included Trials; eTable 5. Network Meta-analysis for Pathological Complete Response after Excluding H2269s Trial; eTable 6. Network Meta-analysis for Breast-conserving Surgery Rate after Excluding NeoSphere Trial; eTable 7. Comparative results from traditional pairwise meta-analysis and network meta-analysis; eTable 8. Network Meta-analysis for Primary Outcomes after Excluding the Trials That Did Not Used HER2-targeted Agents Concomitantly with Chemotherapy; eTable 9. Network Meta-analysis for Primary Outcomes after Excluding the Trials of High Risk of Bias; eTable 10. Network Meta-analysis for Primary Outcomes after Excluding the Trials Presented as Abstracts. [file 3406972.f1.zip]

Archive with 14 entries (13 files):
- 3406972.f1/
- 3406972.f1/eTable 1 Literature Search Strategy.docx
- 3406972.f1/eTable 10 Network Meta-analysis for Primary Outcomes after Excluding the Trials Presented as Abstracts.docx
- 3406972.f1/eTable 2 Characteristic of Included Trials and Patient Populations.docx
- 3406972.f1/eTable 3 Neoadjuvant Treatments of Included Trial.docx
- 3406972.f1/eTable 4 Bias Assessment of Included Trials.docx
- 3406972.f1/eTable 5 Network Meta-analysis for Pathologically Complete Response after Excluding H2269s Trial.docx
- 3406972.f1/eTable 6 Network Meta-analysis for Breast-conserving Surgery Rate after Excluding NeoSphere Trial.docx
- 3406972.f1/eTable 7 Comparative results from traditional pairwise meta-analysis and network meta-analysis.docx
- 3406972.f1/eTable 8 Network Meta-analysis for Primary Outcomes after Excluding the Trials That Did Not Used HER2-targeted Agents Concomitantly with Chemotherapy.docx
- 3406972.f1/eTable 9 Network Meta-analysis for Primary Outcomes after Excluding the Trials of High Risk of Bias.docx
- 3406972.f1/Figure S1.tif
- 3406972.f1/Figure S2.tif
- 3406972.f1/Figure S3.tif
